# Supplementary material for: Adverse events of special interest and mortality following vaccination with mRNA (BNT162b2) and inactivated (CoronaVac) SARS-CoV-2 vaccines in Hong Kong: A retrospective study
Source: PubMed Central journal article supplement (PMC9212142; doi:10.1371/journal.pmed.1004018), 2022-06-21
Supplement: pmed.1004018.s003.pdf [file pmed.1004018.s003.pdf]

S2 Table. Goodness-of-fit of Poisson regression models

| AESI                                          | First dose recipients |                                      |                            | Second dose recipients |                                      |                            |
|-----------------------------------------------|-----------------------|--------------------------------------|----------------------------|------------------------|--------------------------------------|----------------------------|
|                                               | Deviance              | P-value for deviance Chi-square test | P-value for overdispersion | Deviance               | P-value for deviance Chi-square test | P-value for overdispersion |
| Overall AESI                                  | 55,626                | 1.000                                | 0.636                      | 47,079                 | 1.000                                | 0.660                      |
| Guillain-Barré Syndrome                       | -                     | -                                    | -                          | -                      | -                                    | -                          |
| Acute disseminated encephalomyelitis          | -                     | -                                    | -                          | -                      | -                                    | -                          |
| Sleeping disturbance or disorder              | 7,858                 | 1.000                                | 0.624                      | 6,716                  | 1.000                                | 0.654                      |
| Acute aseptic arthritis                       | 2,739                 | 1.000                                | 0.929                      | 2,800                  | 1.000                                | 0.912                      |
| Type 1 Diabetes                               | -                     | -                                    | -                          | -                      | -                                    | -                          |
| (Idiopathic) Thrombocytopenia                 | 723                   | 1.000                                | 0.821                      | -                      | -                                    | -                          |
| Subacute thyroiditis                          | -                     | -                                    | -                          | -                      | -                                    | -                          |
| Microangiopathy                               | -                     | -                                    | -                          | -                      | -                                    | -                          |
| Heart failure                                 | 3,200                 | 1.000                                | 0.317                      | 2,089                  | 1.000                                | 0.871                      |
| Stress cardiomyopathy                         | -                     | -                                    | -                          | -                      | -                                    | -                          |
| Arrhythmia                                    | 10,224                | 1.000                                | 0.999                      | 8,085                  | 1.000                                | 0.762                      |
| Carditis                                      | -                     | -                                    | -                          | -                      | -                                    | -                          |
| Thromboembolism                               | 16,958                | 1.000                                | 0.865                      | 13,484                 | 1.000                                | 0.895                      |
| Coronary artery disease                       | 10,364                | 1.000                                | 0.586                      | 8,979                  | 1.000                                | 0.319                      |
| Myocardial Infarction                         | 7,044                 | 1.000                                | 0.542                      | 5,756                  | 1.000                                | 0.845                      |
| Venous thromboembolism                        | 1,213                 | 1.000                                | 0.808                      | -                      | -                                    | -                          |
| Arterial thromboembolism                      | 9,732                 | 1.000                                | 0.915                      | 7,906                  | 1.000                                | 0.844                      |
| Hemorrhagic disease                           | 3,904                 | 1.000                                | 0.864                      | 2,962                  | 1.000                                | 0.629                      |
| Single Organ Cutaneous Vasculitis             | -                     | -                                    | -                          | -                      | -                                    | -                          |
| Acute liver injury                            | 1,139                 | 1.000                                | 0.666                      | 919                    | 1.000                                | 0.840                      |
| Acute kidney injury                           | 8,528                 | 1.000                                | 0.150                      | 7,194                  | 1.000                                | 0.575                      |
| Acute pancreatitis                            | 1,810                 | 1.000                                | 0.784                      | 1,587                  | 1.000                                | 0.370                      |
| Generalized convulsion                        | 4,757                 | 1.000                                | 0.351                      | 2,859                  | 1.000                                | 0.963                      |
| Meningoencephalitis                           | -                     | -                                    | -                          | -                      | -                                    | -                          |
| Transverse myelitis                           | -                     | -                                    | -                          | -                      | -                                    | -                          |
| Bell's palsy                                  | 2,819                 | 1.000                                | 0.928                      | 2,638                  | 1.000                                | 0.711                      |
| Acute respiratory distress syndrome           | 1,577                 | 1.000                                | 0.912                      | 2,799                  | 1.000                                | 0.893                      |
| Erythema multiforme                           | -                     | -                                    | -                          | -                      | -                                    | -                          |
| Chilblain – like lesions                      | -                     | -                                    | -                          | -                      | -                                    | -                          |
| Anosmia, ageusia                              | -                     | -                                    | -                          | -                      | -                                    | -                          |
| Anaphylaxis                                   | 1,430                 | 1.000                                | 0.152                      | -                      | -                                    | -                          |
| Multisystem inflammatory syndrome in children | -                     | -                                    | -                          | -                      | -                                    | -                          |
| Sudden death                                  | 1,035                 | 1.000                                | 0.878                      | 1,240                  | 1.000                                | 0.795                      |
| Rhabdomyolysis                                | 680                   | 1.000                                | 0.561                      | -                      | -                                    | -                          |
| All-cause mortality                           | 4,172                 | 1.000                                | 0.506                      | 3,083                  | 1.000                                | 0.950                      |

Abbreviations: AESI=adverse event of special interest

Note: Goodness-of-fit of Poisson regression models were assessed only when there were at least five events for a specific AESI in both BNT162b2 and CoronaVac groups, respectively.
