# Supplementary material for: Adverse events of special interest and mortality following vaccination with mRNA (BNT162b2) and inactivated (CoronaVac) SARS-CoV-2 vaccines in Hong Kong: A retrospective study
Source: PubMed Central journal article supplement (PMC9212142; doi:10.1371/journal.pmed.1004018), 2022-06-21
Supplement: pmed.1004018.s004.pdf [file pmed.1004018.s004.pdf]

S3 Table. Sensitivity analysis of the study outcomes by excluding people with previous SARS-CoV-2 infection

| AESI                                | Excluding COVID survivors   |              |         |                             |              |         |
|-------------------------------------|-----------------------------|--------------|---------|-----------------------------|--------------|---------|
|                                     | First dose recipients       |              |         | Second dose recipients      |              |         |
|                                     | CoronaVac vs BNT162b2 (ref) |              |         | CoronaVac vs BNT162b2 (ref) |              |         |
|                                     | IRR                         | 95% CI       | P-value | IRR                         | 95% CI       | P-value |
| Overall AESI                        | 0.98                        | (0.89, 1.09) | 0.726   | 0.97                        | (0.87, 1.08) | 0.546   |
| Sleeping disturbance or disorder    | 0.66                        | (0.49, 0.88) | 0.006   | 0.91                        | (0.66, 1.27) | 0.586   |
| Acute aseptic arthritis             | 1.33                        | (0.79, 2.24) | 0.282   | 1.13                        | (0.68, 1.90) | 0.636   |
| (Idiopathic) Thrombocytopenia       | 0.72                        | (0.24, 2.16) | 0.556   | -                           | -            | -       |
| Heart failure                       | 1.59                        | (0.94, 2.71) | 0.083   | 1.45                        | (0.77, 2.74) | 0.255   |
| Coronary artery disease             | 1.13                        | (0.88, 1.44) | 0.354   | 1.13                        | (0.86, 1.47) | 0.376   |
| Arrhythmia                          | 0.90                        | (0.69, 1.17) | 0.432   | 0.96                        | (0.72, 1.27) | 0.764   |
| Thromboembolism                     | 0.94                        | (0.78, 1.14) | 0.542   | 0.93                        | (0.75, 1.15) | 0.501   |
| Hemorrhagic disease                 | 1.04                        | (0.67, 1.60) | 0.870   | 0.63                        | (0.38, 1.04) | 0.070   |
| Acute liver injury                  | 1.31                        | (0.57, 2.98) | 0.523   | 0.59                        | (0.21, 1.66) | 0.317   |
| Acute kidney injury                 | 2.24                        | (0.97, 5.16) | 0.059   | 0.79                        | (0.30, 2.06) | 0.624   |
| Acute pancreatitis                  | 1.08                        | (0.51, 2.30) | 0.838   | 1.62                        | (0.81, 3.24) | 0.173   |
| Generalized convulsion              | 1.41                        | (0.92, 2.17) | 0.117   | 0.73                        | (0.43, 1.25) | 0.250   |
| Bell's palsy                        | 1.95                        | (1.12, 3.41) | 0.018   | 0.88                        | (0.51, 1.51) | 0.641   |
| Acute respiratory distress syndrome | 0.81                        | (0.40, 1.66) | 0.571   | 1.27                        | (0.76, 2.13) | 0.360   |
| Anaphylaxis                         | 0.34                        | (0.14, 0.79) | 0.012   | -                           | -            | -       |
| Sudden death                        | 0.97                        | (0.39, 2.38) | 0.943   | 1.80                        | (0.69, 4.73) | 0.232   |
| Rhabdomyolysis                      | 1.48                        | (0.46, 4.79) | 0.513   | -                           | -            | -       |
| Myocardial Infarction               | 1.18                        | (0.87, 1.60) | 0.287   | 0.91                        | (0.65, 1.28) | 0.604   |
| Venous thromboembolism              | 0.57                        | (0.26, 1.29) | 0.180   | -                           | -            | -       |
| Arterial thromboembolism            | 1.02                        | (0.79, 1.33) | 0.858   | 1.12                        | (0.84, 1.50) | 0.446   |
| All-cause mortality                 | 0.96                        | (0.63, 1.48) | 0.866   | 0.85                        | (0.51, 1.40) | 0.516   |

Abbreviations: AESI=adverse event of special interest; CI=confidence interval; IRR=incidence rate ratio

Note: IRR was estimated only when there were at least five events for a specific AESI in both BNT162b2 and CoronaVac groups, respectively.
