# Supplementary material for: Adverse events of special interest and mortality following vaccination with mRNA (BNT162b2) and inactivated (CoronaVac) SARS-CoV-2 vaccines in Hong Kong: A retrospective study
Source: PubMed Central journal article supplement (PMC9212142; doi:10.1371/journal.pmed.1004018), 2022-06-21
Supplement: pmed.1004018.s005.pdf [file pmed.1004018.s005.pdf]

S1 Fig. The observed propensity score weighting distribution after truncation of <1st and >99th percentiles by the first and second vaccine dose

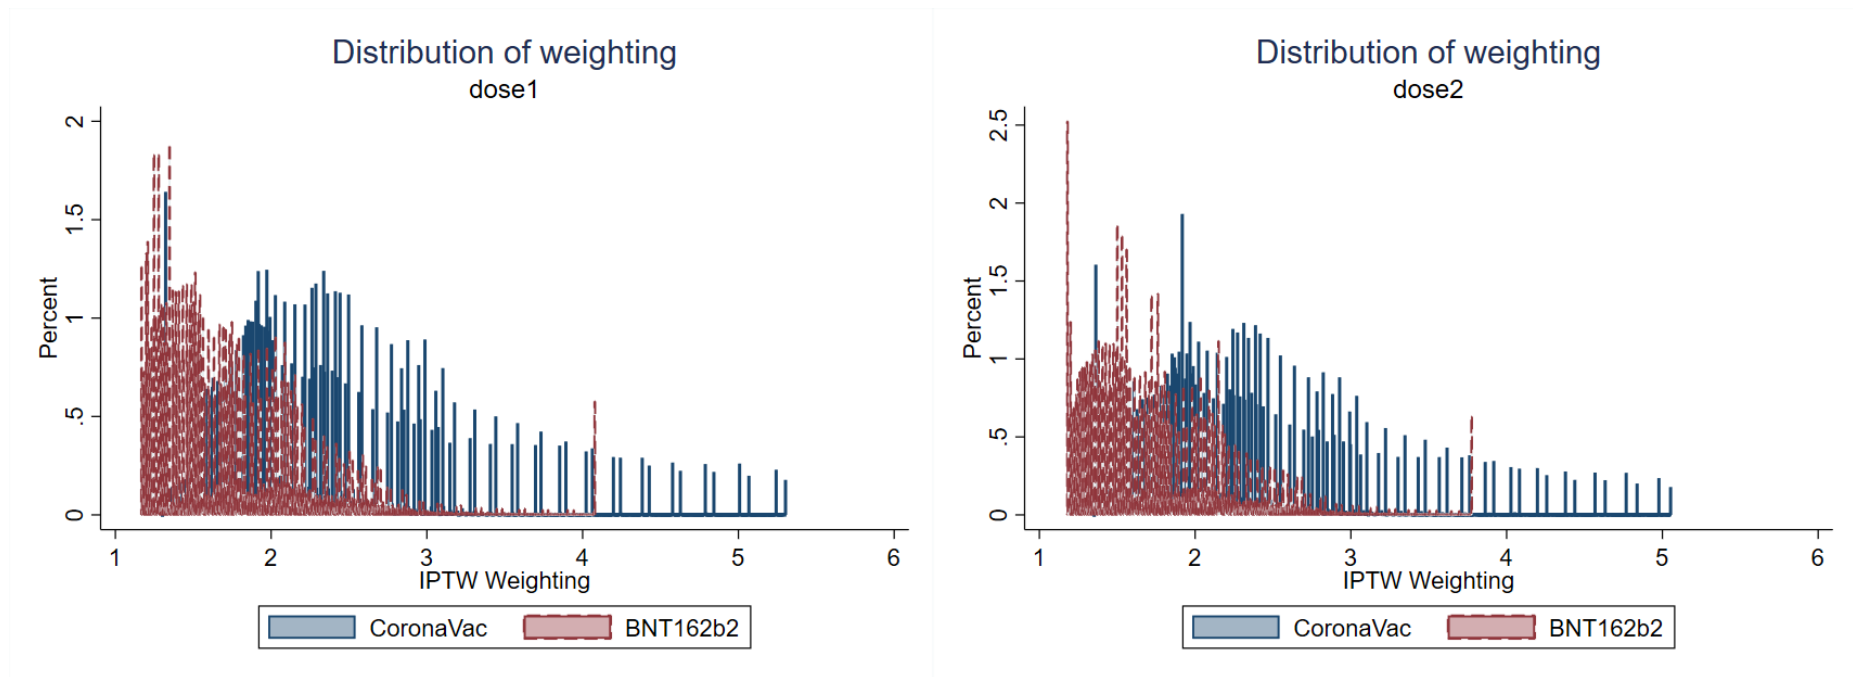

Note: IPTW=inverse probability of treatment weighting
