# Supplementary material for: Adverse events of special interest and mortality following vaccination with mRNA (BNT162b2) and inactivated (CoronaVac) SARS-CoV-2 vaccines in Hong Kong: A retrospective study
Source: PubMed Central journal article supplement (PMC9212142; doi:10.1371/journal.pmed.1004018), 2022-06-21

S2 Fig. Distribution of propensity score density by the first and second vaccine dose before and after weighting

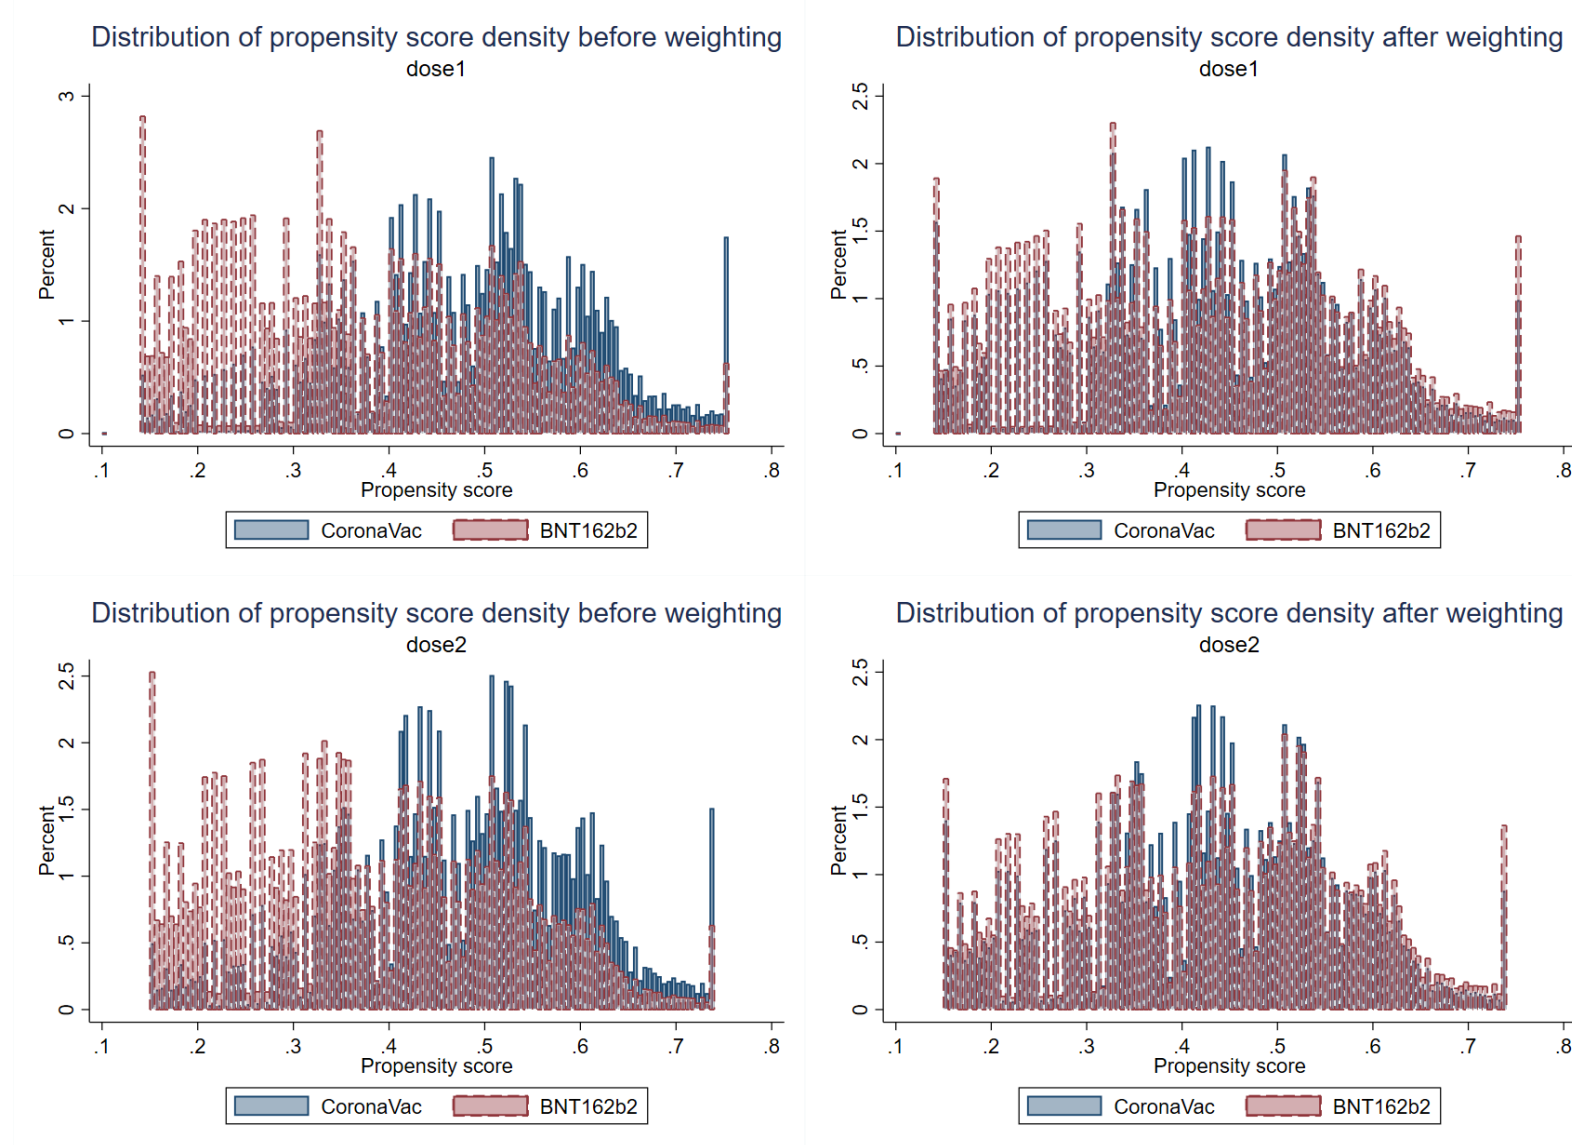

Supplement: pmed.1004018.s006.pdf [file pmed.1004018.s006.pdf]
